# Supplementary material
Source: PubMed Central journal article supplement (PMC9470085)
Supplement: NIHMS1575900-supplement-1.pdf [file NIHMS1575900-supplement-1.pdf]

## Supplemental Tables

**Table 1-S.** Unadjusted rate ratios (RR) for achieving a second CE-IM following recurrence by baseline characteristics and recurrence grade among 30 patients who experienced recurrence and had at least one additional surveillance endoscopy with first CE-IM defined as two negative endoscopies.

| Characteristic                                   | Second CE-IM<br>- N (%) | No Second CE-IM<br>- N (%) | Unadjusted RR (95%<br>CL) |
|--------------------------------------------------|-------------------------|----------------------------|---------------------------|
| Age (years) - 40 to 59                           | 9 (69.2)                | 4 (80.0)                   | Ref.                      |
| - 60 to 79                                       | 1 (7.7)                 | 1 (20.0)                   | 1.20 (0.17 – 52.78)       |
| - 80 to 99                                       | 3 (23.1)                | 0 (0.0)                    | 2.69 (0.22 – 141.26)      |
| BMI (mg/kg <sup>2</sup> ) - Normal (18.5 - 24.9) | 3 (23.1)                | 0 (0.0)                    | Ref.                      |
| - Overweight (25.0 - 29.9)                       | 2 (15.4)                | 3 (40.0)                   | 0.23 (0.02 – 1.96)        |
| - Obesity (>=30)                                 | 8 (61.5)                | 2 (60.0)                   | 0.88 (0.21 – 5.16)        |
| Female                                           | 2 (15.4)                | 1 (20.0)                   | Ref.                      |
| Male                                             | 11 (84.6)               | 4 (80.0)                   | 0.52 (0.11 – 4.81)        |
| Prague M length (cm) - 0 to 3                    | 3 (23.1)                | 2 (40.0)                   | Ref.                      |
| - 4 or greater                                   | 10 (76.9)               | 3 (60.0)                   | 0.89 (0.23 – 5.05)        |
| Prague C length (cm) - 0 to 3                    | 10 (76.9)               | 5 (100.0)                  | Ref.                      |
| - 4 or greater                                   | 3 (23.1)                | 0 (0.0)                    | 3.47 (0.61 – 13.48)       |
| Baseline grade - Low-grade dysplasia             | 3 (23.1)                | 2 (40.0)                   | Ref.                      |
| - High-grade dysplasia                           | 9 (69.2)                | 3 (60.0)                   | 3.84 (0.07 – 47.88)       |
| - Intramucosal adenocarcinoma                    | 1 (7.7)                 | 0 (0.0)                    | 2.24 (0.56 – 12.86)       |
| Recurrence grade – non-dysplastic                | 7 (53.8)                | 1 (20.0)                   | Ref.                      |
| - Low-grade dysplasia                            | 3 (0.23)                | 3 (60.0)                   | 0.36 (0.06 – 1.59)        |
| - High-grade dysplasia                           | 3 (0.23)                | 1 (20.0)                   | 0.87 (0.15 – 3.83)        |
| Non-dysplastic recurrence                        | 7 (53.8)                | 1 (20.0)                   | Ref.                      |
| - Dysplastic recurrence                          | 6 (46.2)                | 4 (80.0)                   | 0.51 (0.14 – 1.78)        |

BMI, body mass index.

**Table 2-S.** Unadjusted and mutually adjusted rate ratios (RR) for recurrence by baseline characteristics following complete eradication of intestinal metaplasia (CE-IM) among patients with at least one surveillance endoscopy after achieving CE-IM with CE-IM defined as two negative endoscopies.

| Characteristic                                   | Recurrence – No Recurrence |            | Unadjusted RR<br>(95% CL) | Adjusted RR<br>(95% CL) |
|--------------------------------------------------|----------------------------|------------|---------------------------|-------------------------|
|                                                  | N (%)                      | - N (%)    |                           |                         |
| Age (years) – 25 to 60                           | 3 (10.7)                   | 19 (16.5)  | 0.62 (0.15 – 1.80)        | 0.84 (0.10 – 2.66)      |
| - 61 to 80                                       | 20 (71.4)                  | 78 (67.8)  | Ref.                      | Ref.                    |
| - 81 to 101                                      | 5 (17.9)                   | 18 (15.7)  | 1.09 (0.36 – 2.69)        | 1.18 (0.36 – 3.28)      |
| BMI (mg/kg <sup>2</sup> ) – Normal (18.5 – 24.9) | 6 (21.4)                   | 14 (12.4)  | Ref.                      | Ref.                    |
| - Overweight (25.0 – 29.9)                       | 9 (32.1)                   | 49 (43.4)  | 0.49 (0.18 – 1.48)        | 0.41 (0.14 – 1.31)      |
| - Obesity (>=30)                                 | 13 (46.4)                  | 50 (44.2)  | 0.55 (0.22 – 1.57)        | 0.54 (0.20 – 1.64)      |
| Female                                           | 4 (14.3)                   | 40 (34.8)  | Ref.                      | Ref.                    |
| Male                                             | 24 (85.7)                  | 75 (65.2)  | 2.36 (0.91 – 8.02)        | 2.53 (0.96 – 8.72)      |
| Prague M length (cm) – 0 to 3                    | 9 (32.1)                   | 52 (46.4)  | Ref.                      | Ref.                    |
| - 4 or greater                                   | 19 (67.9)                  | 60 (53.6)  | 1.78 (0.83 – 4.14)        | 1.61 (0.70 – 3.89)      |
| Prague C length (cm) – 0 to 3                    | 24 (85.7)                  | 108 (93.9) | Ref.                      | Ref.                    |
| - 4 or greater                                   | 4 (14.3)                   | 7 (6.1)    | 2.62 (0.77 – 6.77)        | 2.49 (0.67 – 7.50)      |
| Baseline grade – Low-grade dysplasia             | 9 (32.1)                   | 37 (32.2)  | Ref.                      | Ref.                    |
| - High-grade dysplasia                           | 18 (64.3)                  | 68 (59.1)  | 1.30 (0.60 – 3.03)        | 1.31 (0.59 – 3.13)      |
| - Intramucosal adenocarcinoma                    | 1 (3.6)                    | 10 (8.7)   | 0.50 (0.03 – 2.65)        | 0.65 (0.03 – 3.86)      |

BMI, body mass index.

**Table 3-S.** Unadjusted and mutually adjusted rate ratios (RR) for dysplastic recurrence by baseline characteristics following complete eradication of intestinal metaplasia (CE-IM) among patients with at least one surveillance endoscopy after achieving CE-IM with CE-IM defined as two negative endoscopies.

| Characteristic                                   | Recur - N (%) | No Recurrence - N (%) | Unadjusted RR (95% CL) | Adjusted RR (95% CL) |
|--------------------------------------------------|---------------|-----------------------|------------------------|----------------------|
| Age (years) - 25 to 60                           | 1 (9.1)       | 21 (15.9)             | 0.59 (0.03 – 3.30)     | 0.77 (0.17 – 2.42)   |
| - 61 to 80                                       | 7 (63.6)      | 91 (68.9)             | Ref.                   | Ref.                 |
| - 81 to 101                                      | 3 (27.3)      | 20 (15.2)             | 1.87 (0.40 – 6.71)     | 1.67 (0.56 – 4.39)   |
| BMI (mg/kg <sup>2</sup> ) - Normal (18.5 - 24.9) | 1 (9.1)       | 19 (14.6)             | Ref.                   | Ref.                 |
| - Overweight (25.0 - 29.9)                       | 4 (36.4)      | 54 (41.5)             | 1.32 (0.20 – 25.8)     | 0.72 (0.23 – 2.69)   |
| - Obesity (>=30)                                 | 6 (54.5)      | 57 (43.8)             | 1.53 (0.26 – 28.9)     | 1.03 (0.34 – 3.84)   |
| Female                                           | 2 (18.2)      | 42 (31.8)             | Ref.                   | Ref.                 |
| Male                                             | 9 (81.8)      | 90 (68.2)             | 1.77 (0.46 – 11.6)     | 0.65 (0.23 – 2.69)   |
| Prague M length (cm) - 0 to 3                    | 4 (44.2)      | 57 (44.2)             | Ref.                   | Ref.                 |
| - 4 or greater                                   | 7 (63.6)      | 72 (55.8)             | 1.48 (0.45 – 5.65)     | 2.34 (0.99 – 6.14)   |
| Prague C length (cm) - 0 to 3                    | 11 (100.0)    | 121 (91.7)            | No estimate*           |                      |
| - 4 or greater                                   | 0 (0.0)       | 11 (8.3)              |                        |                      |
| Baseline grade – Low-grade dysplasia             | 1 (9.1)       | 45 (34.1)             | No estimate*           |                      |
| - High-grade dysplasia                           | 10 (90.9)     | 76 (57.6)             |                        |                      |
| - Intramucosal adenocarcinoma                    | 0 (0.0)       | 11 (8.3)              |                        |                      |

BMI, body mass index. \*An estimate could not be generated for Prague C length or baseline histologic grade in this table due to empty cells.
